# Supplementary material
Source: HighWire-hosted journal article supplement (https://bmjopen.bmj.com/content/12/2/e052118)
Supplement: inline-supplementary-material-1 [file inline-supplementary-material-1.pdf]

Please rank each item as to whether you **1: Strongly Disagree with the statement, 2: Disagree with the statement, 3: Agree with the statement, or 4: Strongly Agree with the statement.** There is no right or wrong answer. We only want to learn about your opinions, so please answer each question as honestly as you can.

|    |                                                                                                                                                            | Strongly Disagree | Disagree | Agree | Strongly Agree |
|----|------------------------------------------------------------------------------------------------------------------------------------------------------------|-------------------|----------|-------|----------------|
| 1  | Unmarried adolescents seeking sexual and reproductive health services should be told to abstain when they ask for contraceptives.                          | 1                 | 2        | 3     | 4              |
| 2  | If a girl asks me a question about sex, I should answer the question honestly                                                                              | 1                 | 2        | 3     | 4              |
| 3  | Adolescent boys should be taught that masturbation is dangerous.                                                                                           | 1                 | 2        | 3     | 4              |
| 4  | Health care providers should pressure on clients to make them admit that they have been a victim of sexual or gender-based violence                        | 1                 | 2        | 3     | 4              |
| 5  | Boys and girls should not be given information about puberty because it will encourage them to engage in sexual behavior.                                  | 1                 | 2        | 3     | 4              |
| 6  | Only girls should be given information about sexual and reproductive health because they are the ones who have the most issues related to sexual behavior. | 1                 | 2        | 3     | 4              |
| 7  | Discussing sexual intercourse with unmarried women and men is shameful.                                                                                    | 1                 | 2        | 3     | 4              |
| 8  | Unmarried youth should never be asked about reproductive health concerns because they are not sexually active.                                             | 1                 | 2        | 3     | 4              |
| 9  | If a girl has irregular periods, I will suspect she is sexually active.                                                                                    | 1                 | 2        | 3     | 4              |
| 10 | The best way to prevent unmarried adolescents from becoming sexually active is to keep them in the dark about these issues.                                | 1                 | 2        | 3     | 4              |
| 11 | Educating youth on reproductive health topics leads to sexual immorality.                                                                                  | 1                 | 2        | 3     | 4              |
| 12 | Youth who are out of school are more likely to be sexually promiscuous than youth in school.                                                               | 1                 | 2        | 3     | 4              |
| 13 | If a boy or a girl has a genital ulcer, it is because he or she is promiscuous.                                                                            | 1                 | 2        | 3     | 4              |
| 14 | If a girl has irregular periods, her parents should be informed.                                                                                           | 1                 | 2        | 3     | 4              |
| 15 | I would feel comfortable counseling a young man showing symptoms of STIs.                                                                                  | 1                 | 2        | 3     | 4              |
| 16 | I would feel comfortable treating an unmarried girl with an ovarian cyst.                                                                                  | 1                 | 2        | 3     | 4              |
| 17 | I would treat an unmarried woman showing symptoms of STIs without judging her.                                                                             | 1                 | 2        | 3     | 4              |

|    |                                                                                                                                                   |   |   |   |   |
|----|---------------------------------------------------------------------------------------------------------------------------------------------------|---|---|---|---|
| 18 | Contraceptives should not be given to young women who suffer reproductive health issues because it will negatively affect their future fertility. | 1 | 2 | 3 | 4 |
| 19 | Girls should not receive any information about contraceptives before they are married because it will cause them to become sexually active.       | 1 | 2 | 3 | 4 |
| 20 | Asking youth if they are victims of any kind of violence is considered interfering with their personal or family issues.                          | 1 | 2 | 3 | 4 |
| 21 | Boys should be taught how to use a condom                                                                                                         | 1 | 2 | 3 | 4 |
| 22 | Unmarried adolescents should not be provided with contraceptives because culture and religion prohibit engagement in premarital sex.              | 1 | 2 | 3 | 4 |
| 23 | Youth should learn about contraceptives before marriage                                                                                           | 1 | 2 | 3 | 4 |
| 24 | Teaching unmarried youth about contraceptives is acceptable.                                                                                      | 1 | 2 | 3 | 4 |
| 25 | Healthcare providers should provide both married and unmarried adolescents with contraceptives if they ask for them.                              | 1 | 2 | 3 | 4 |
| 26 | An unmarried girl should never be given contraceptives to treat menstrual cramps or irregular periods.                                            | 1 | 2 | 3 | 4 |
| 27 | If a boy asks for condoms, it shows responsibility.                                                                                               | 1 | 2 | 3 | 4 |
| 28 | I feel comfortable providing adolescent girls with contraceptives for any reason                                                                  | 1 | 2 | 3 | 4 |
| 29 | In my culture, it is wrong for adolescents to use contraceptives                                                                                  | 1 | 2 | 3 | 4 |
| 30 | I would scold an unmarried adolescent if he or she asks for contraceptives.                                                                       | 1 | 2 | 3 | 4 |
| 31 | I would refuse to provide contraceptives for adolescents before marriage.                                                                         | 1 | 2 | 3 | 4 |
| 32 | Parents should be informed if their unmarried daughters come to a health facility to seek reproductive health services                            | 1 | 2 | 3 | 4 |
| 33 | Youth should be given the same level of confidentiality when receiving sexual and reproductive health services as adults                          | 1 | 2 | 3 | 4 |
| 34 | Reproductive health services are not necessary for boys.                                                                                          | 1 | 2 | 3 | 4 |
| 35 | The concerns that youth have regarding reproductive health are not important                                                                      | 1 | 2 | 3 | 4 |
| 36 | Reproductive health services are only available for married women                                                                                 | 1 | 2 | 3 | 4 |
| 37 | If a young woman comes into a health facility and says she has been the victim of sexual assault, she probably did something to deserve it.       | 1 | 2 | 3 | 4 |

|    |                                                                                                                                             |   |   |   |   |
|----|---------------------------------------------------------------------------------------------------------------------------------------------|---|---|---|---|
| 38 | Women and men of all ages should be welcomed into the clinic for sexual and reproductive health services if they seek them.                 | 1 | 2 | 3 | 4 |
| 39 | Parents need to provide permission for their daughters to receive any reproductive health services.                                         | 1 | 2 | 3 | 4 |
| 40 | It is important to make sure that any services provided to youth are done so privately so no one else in the clinic can hear.               | 1 | 2 | 3 | 4 |
| 41 | Educational materials on sexual and reproductive health should be openly available to unmarried boys and girls.                             | 1 | 2 | 3 | 4 |
| 42 | Schools and health facilities should work together to provide reproductive health information and services to youth.                        | 1 | 2 | 3 | 4 |
| 43 | If a young woman says that she has experienced sexual or gender-based violence, I will call official institutions to help her.              | 1 | 2 | 3 | 4 |
| 44 | My personal beliefs guide the way I provide health services to adolescents                                                                  | 1 | 2 | 3 | 4 |
| 45 | My religion supports the provision of sexual and reproductive health information and services to youth, regardless of their marital status. | 1 | 2 | 3 | 4 |
| 46 | I am afraid that I would be punished if I provide any reproductive health services to unmarried adolescents.                                | 1 | 2 | 3 | 4 |
| 47 | I am not trained to address the reproductive health needs of youth.                                                                         | 1 | 2 | 3 | 4 |
| 48 | Health workers play an important role in reducing sexual and reproductive health problems among pre-marital adolescents.                    | 1 | 2 | 3 | 4 |
| 49 | I would feel annoyed if a young, unmarried woman came to me with symptoms of induced abortion.                                              | 1 | 2 | 3 | 4 |
| 50 | Sexual and gender-based violence among youth should receive governmental attention as a significant social issue.                           | 1 | 2 | 3 | 4 |
| 51 | Sexual and gender-based violence among youth should receive governmental attention as a significant social issue.                           | 1 | 2 | 3 | 4 |
| 52 | Sexual and gender-based violence among youth should receive governmental attention as a significant social issue.                           | 1 | 2 | 3 | 4 |
